# Supplementary material
Source: PubMed Central journal article supplement (PMC5826762)
Supplement: NIHMS898603-supplement-Supplement_1.pdf [file NIHMS898603-supplement-Supplement_1.pdf]

### Histogram of ADI

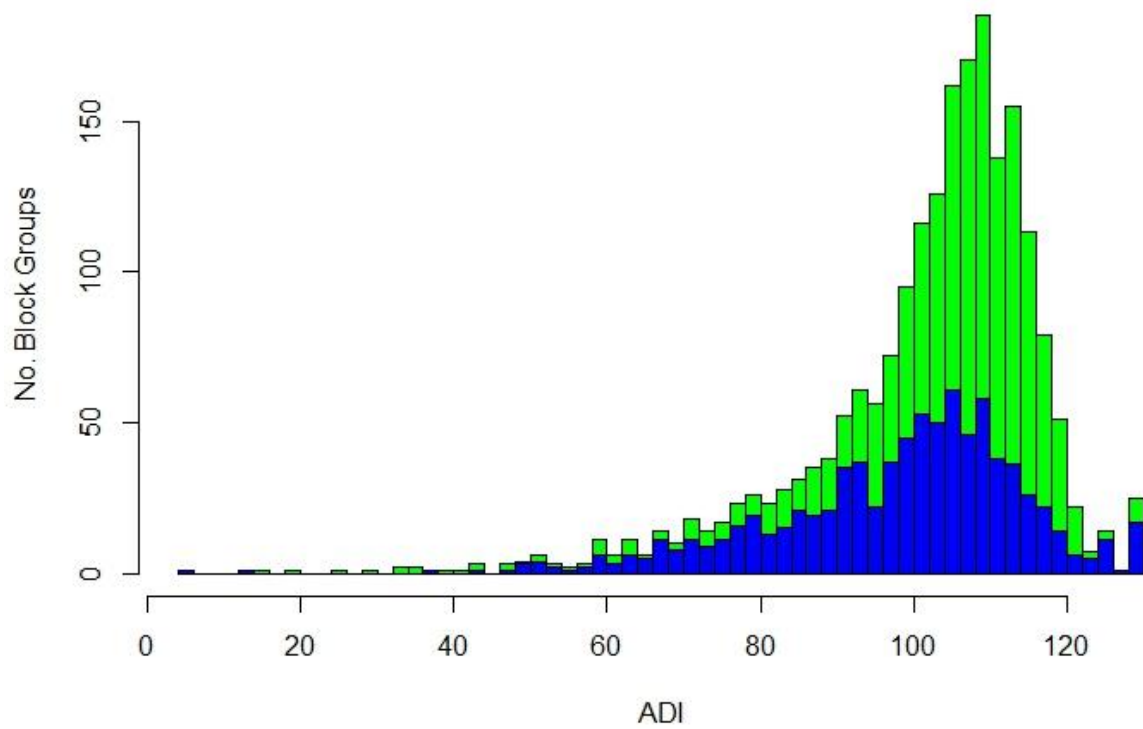

**Supplement 1:** Histogram of block group-level raw ADI values for North Carolina (green) and for the area included in this study (blue).
